# Supplementary material for: eHealthResp, a Digital Intervention to Improve Antibiotic Prescribing in Respiratory Infections: A Pilot Study
Source: MDPI journal article supplement (doi:10.3390/life12081160), 2022-07-30

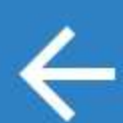

## About Us

### Scientific authors

Adolfo Figueiras Guzmán<sup>1</sup>

Antonio Lirola Delgado<sup>2</sup>

Carlos Regueira Méndez<sup>1</sup>

Fátima Roque<sup>3</sup>

Maria Teresa Herdeiro<sup>4</sup>

Maruxa Zapata Cachafeiro<sup>1</sup>

### Interface and usability

Ana Margarida Pisco Almeida<sup>5</sup>

Fátima Roque<sup>3</sup>

João Moura<sup>4 5</sup>

Maria Teresa Herdeiro<sup>4</sup>

Marta Estrela<sup>4</sup>

### Graphic design

Claudia Ferreiro Vega<sup>1</sup>

João Moura<sup>4 5</sup>

### Technical Authors

Verónica Rodríguez Cepeda<sup>6</sup>

José Pose Salgueiro<sup>6</sup>

### More Information

1. Consortium for Biomedical Research in Epidemiology and Public Health (CIBER Epidemiology and Public Health-CIBERESP), University of Santiago de Compostela, Santiago

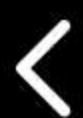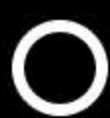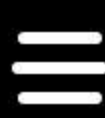

v1.0.0

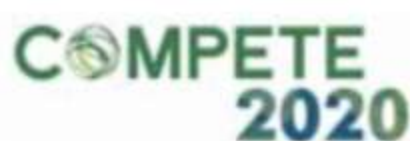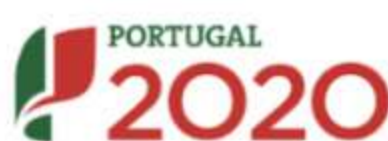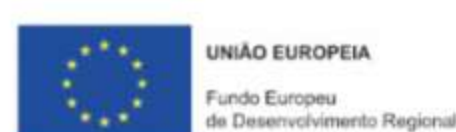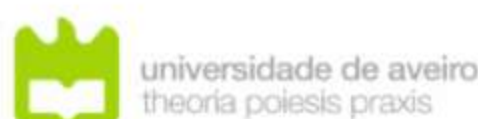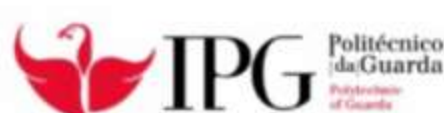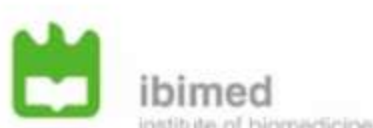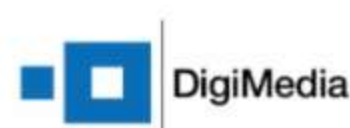

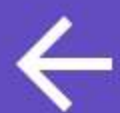

# What is the main symptom?

Cough

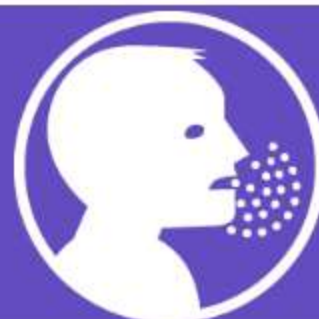

Nasal symptoms

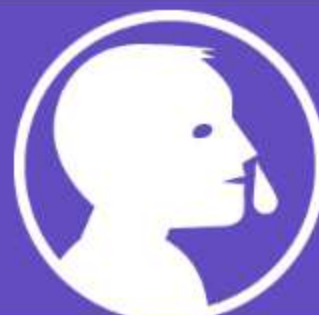

Sore throat

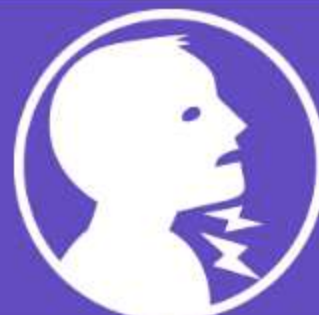

Fever

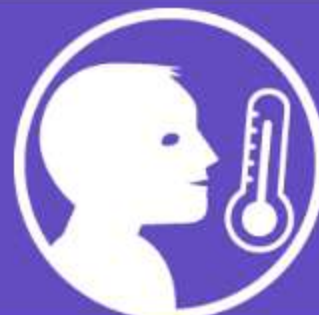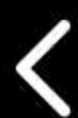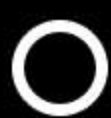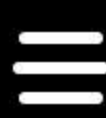



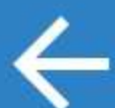

# What is your main suspicion?

Acute otitis media

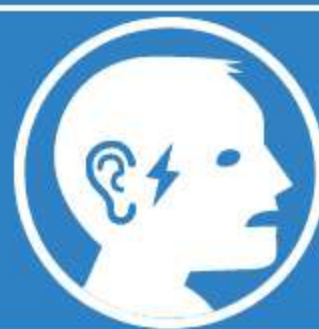

Acute Rhinosinusitis

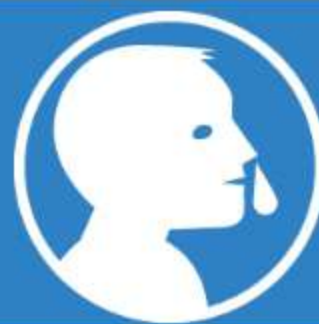

Acute pharyngotonsillitis

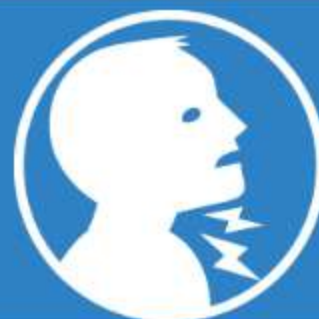

Tracheobronchitis

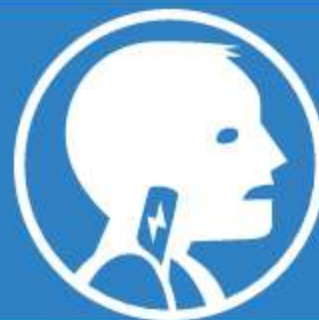

Pneumonia

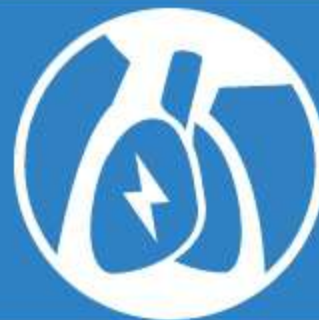

## ✓ Probable diagnosis

# Acute otitis media

## Treatment

### Medication

- Treatment with anti-inflammatory and analgesic drugs to relieve pain
- Antipyretic if you have fever
- Use of nasal decongestants to facilitate drainage of the middle ear
- Vasoconstrictor nasal drops
- Ear drops (with prior assessment)
- Hydration

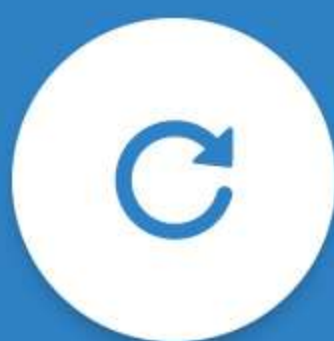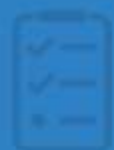

Summary

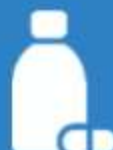

Treatment

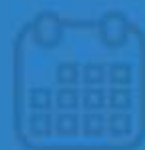

Prognosis

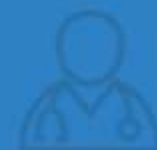

Derive

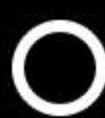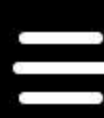

Supplement: s1 [file s1]
