# Supplementary material for: eHealthResp, a Digital Intervention to Improve Antibiotic Prescribing in Respiratory Infections: A Pilot Study
Source: MDPI journal article supplement (doi:10.3390/life12081160), 2022-07-30
Supplement: s1 [file s1]

a)

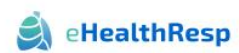

[Home](#) [Comunicações](#) [Curso](#) [Aplicação](#) [Sobre](#) [Contactos](#) [Iniciar sessão](#) [Português](#) ▾

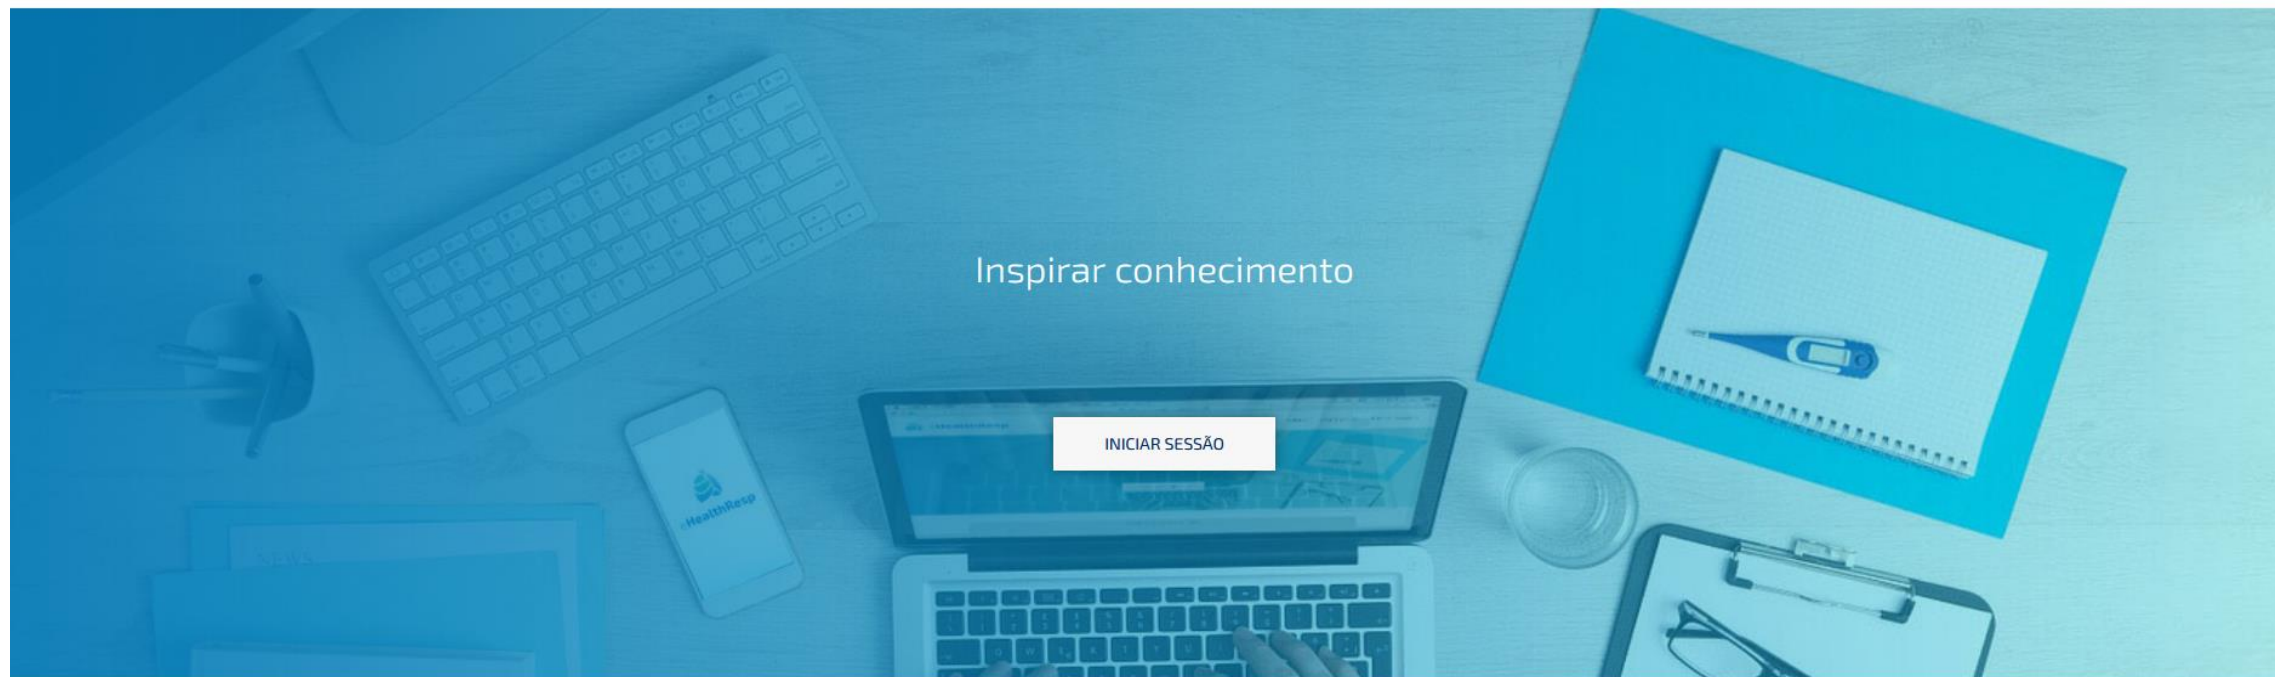

b)

Com o financiamento de:

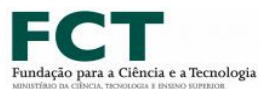

Cofinanciado por:

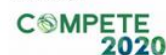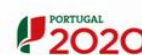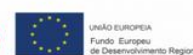

Com o apoio de:

1)

a)

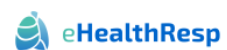

[Home](#) [Comunicações](#) [Curso](#) [Aplicação](#) [Sobre](#) [Contactos](#) [Iniciar sessão](#) [Português](#)

c)

## Login

Para aceder aos conteúdos do curso, inicie sessão com os dados de acesso fornecidos.

Nome de utilizador ou endereço de email

Senha

☐ Lembrar-me

Iniciar sessão

2021 eHealthResp | [Créditos do projeto](#)

b)

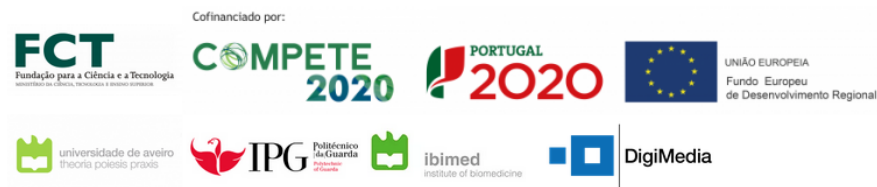

2)

a)

d)

## Diagnóstico e terapêutica nas afeções respiratórias

Este curso é destinado a médicos. O objetivo é atualizar e consolidar conhecimentos no que concerne a afeções do trato respiratório superior. Através do [Link](#), terá acesso à aplicação móvel, que utiliza algoritmos de apoio à decisão clínica para uma avaliação adequada dos sintomas.

e)

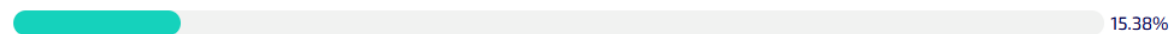

CONTINUAR

f)

| Apresentação                                                                        |                                              |        |
|-------------------------------------------------------------------------------------|----------------------------------------------|--------|
|    | Introdução                                   | 1 de 1 |
| Conteúdos                                                                           |                                              |        |
|  | Otite Média                                  | 1 de 6 |
|  | Rinossinusite aguda                          | 2 de 6 |
|  | Faringoamigdalite Aguda                      | 3 de 6 |
|  | Bronquite Aguda                              | 4 de 6 |
|  | Pneumonia Adquirida na Comunidade            | 5 de 6 |
|  | Infeções respiratórias em tempos de COVID-19 | 6 de 6 |

3)

a)

g)

h)

i)

4)

The screenshot displays the eHealthResp website interface. At the top, the header includes the eHealthResp logo and a navigation menu with links: Home, Comunicações, Curso, Aplicação, Sobre, Contactos, Terminar sessão, and a language dropdown set to Português. The main content area is titled 'Rinossinusite aguda' and includes a link to 'Voltar a: Diagnóstico e terapêutica nas afeções respiratórias'. A large anatomical illustration of a human head in profile, showing the nasal cavity and sinuses, is featured on the right. Below the title, a row of logos represents the funding and partner organizations: FCT (Fundação para a Ciência e a Tecnologia), COMPETE 2020, PORTUGAL 2020, UNIAO EUROPEIA (European Union), universidade de aveiro, IPG (Instituto Português de Geriatria), ibimed (Instituto de Biomedicina), and DigiMedia. At the bottom of the page, there are four buttons: '✓ Marcar como concluído' (Mark as completed), '↶ Descarregar módulo' (Download module), '← Módulo anterior' (Previous module), and 'Próximo módulo →' (Next module). A progress bar with 15 segments is located above the bottom buttons.

5)

a)

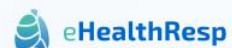

Home Comunicações Curso Aplicação Sobre Contactos Iniciar sessão Português ▾

## j) Sobre o projeto

### k) eHealthResp

Sendo um dos maiores problemas de saúde pública a nível global, a resistência a antibióticos tem como uma das principais causas o uso inadequado dos mesmos.

Com o desenvolvimento das tecnologias móveis e presença no quotidiano da maioria da população, surgem novas oportunidades para aprimorar a decisão clínica e diminuir o uso inadequado de antibióticos. É neste sentido que o projeto eHealthResp propõe o desenvolvimento e avaliação de ferramentas eHealth para apoiar a decisão clínica e o empoderamento do doente no tratamento de afecções respiratórias superiores: um curso online direcionado a médicos e farmacêuticos, bem como uma app móvel baseada no suporte à decisão clínica (CDS) direcionada a médicos.

6)

a)

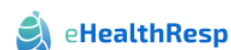

Home Comunicações Curso Aplicação Sobre Contactos Iniciar sessão Portugalês ▾

n)

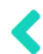

## Publicações

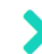

### Poster

Carvalho, Érico; Estrela, Marta; Roque, Maria de Fátima dos Santos Marques; Zapata-Cachafeiro, Maruxa; Figueiras, Adolfo; Herdeiro, Maria Teresa. "Assessing the impact of e-Health tools on antibiotic use". Trabalho apresentado em ISOP Patient Safety Day 2020, 2020. <https://isoponline.org/wp-content/uploads/2020/09/Poster-PSD-2020-Project-eHealthResp.pdf>

### Artigo

Moura, J., Almeida, A. M., Roque, F., Figueiras, A., & Herdeiro, M. T. (2020). eHealthResp – mobile tool for upper respiratory clinical support: A co-design approach (Preprint). Journal of Medical Internet Research. <https://doi.org/10.2196/19194>

### Artigo

Oliveira, I., Rego, C., Semedo, G., Gomes, D., Figueiras, A., Roque, F., & Herdeiro, M. T. (2020). Systematic Review on the Impact of Guidelines Adherence on Antibiotic Prescription in Respiratory Infections. Antibiotics, 9(9), 546. <https://doi.org/10.3390/antibiotics9090546>

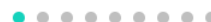

o)

Quer saber mais sobre o eHealthResp?

Se quiser saber mais sobre a abrangência do estudo, não hesite em contactar-nos.

a)

p)

## Contacte-nos

Para esclarecimentos à cerca do projecto, não hesite em contactar-nos.

✉ Email: [ibimed-ehealthresp@ua.pt](mailto:ibimed-ehealthresp@ua.pt)

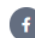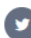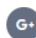

Nome \*

Email \*

Assunto

Mensagem \*

Enviar

7)

a)

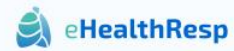

[Home](#) [Comunicações](#) [Curso](#) [Aplicação](#) [Sobre](#) [Contactos](#) [Terminar sessão](#) [Português](#) ▾

## q) eHealthResp – mobile

Esta aplicação é uma ferramenta especificamente com o objetivo de auxiliar os farmacêuticos no aconselhamento dos doentes em casos de afeções do trato respiratório superior. Orienta o diagnóstico mais provável com base nos sintomas respiratórios, sugerindo a consulta de um médico sempre que necessário.

Para usar aplicação irá precisar de uma chave de acesso  
(acesso indisponível de momento)

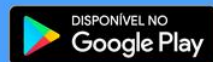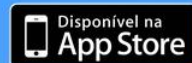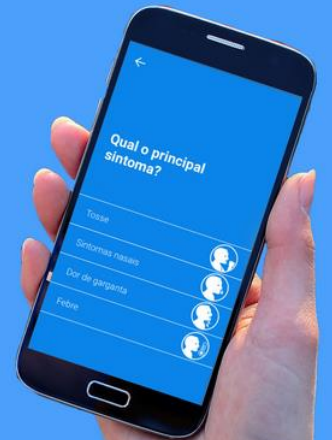

8)
